# Supplementary material
Source: HighWire-hosted journal article supplement (https://jnm.snmjournals.org/highwire/filestream/94942/field_highwire_adjunct_files/0/172759_Supplemental_Data.pdf)
Supplement: 172759_Supplemental_Data.pdf [file 172759_Supplemental_Data.pdf]

**SUPPLEMENTAL TABLE 1**  
Population characteristics

| Characteristics                                                      | N of patients (%) |
|----------------------------------------------------------------------|-------------------|
| N                                                                    | 46 (100)          |
| Age (years), median [range]                                          | 46 [26-85]        |
| Menopausal status                                                    |                   |
| Yes                                                                  | 18 (39)           |
| No                                                                   | 28 (61)           |
| Tumor size                                                           |                   |
| ≤ 2 cm                                                               | 3 (6)             |
| 2 cm < size ≤ 5 cm                                                   | 39 (85)           |
| > 5 cm                                                               | 4 (9)             |
| Histological type                                                    |                   |
| Ductal                                                               | 45 (98)           |
| Lobular                                                              | 1 (2)             |
| AJCC* clinical stage                                                 |                   |
| IIA                                                                  | 16 (35)           |
| IIB                                                                  | 14 (30)           |
| IIIA                                                                 | 4 (9)             |
| IIIB                                                                 | 2 (4)             |
| IIIC                                                                 | 10 (22)           |
| Tumor grading (SBR†)                                                 |                   |
| Grade I                                                              | 0 (0)             |
| Grade II                                                             | 8 (18)            |
| Grade III                                                            | 36 (78)           |
| Unavailable                                                          | 2 (4)             |
| Number of mitoses                                                    |                   |
| Score I                                                              | 3 (7)             |
| Score II                                                             | 8 (17)            |
| Score III                                                            | 31 (67)           |
| Unavailable                                                          | 4 (9)             |
| chemotherapy regimen                                                 |                   |
| 6 courses of fluorouracil, epirubicin and cyclophosphamide (FEC 100) | 3 (7)             |
| 3 courses of FEC 100, followed by 3 courses of docetaxel             | 43 (93)           |
| Surgery                                                              |                   |
| Mastectomy                                                           | 16 (35)           |
| Breast-conserving                                                    | 30 (65)           |
| Histological response                                                |                   |
| pCR                                                                  | 20 (43)           |
| No pCR                                                               | 26 (57)           |
| Follow-up information                                                |                   |
| Months, median [range]                                               | 30 [6-73]         |
| Index cancer recurrence, n (%)                                       | 8 (17)            |
| Index cancer death, n (%)                                            | 7 (15)            |

\*American Joint Committee on Cancer staging (tumor size assessed with US scan, lymph node involvement and metastasis status assessed both with US scan and with FDG PET).

† SBR = scarf-bloom-Richardson.

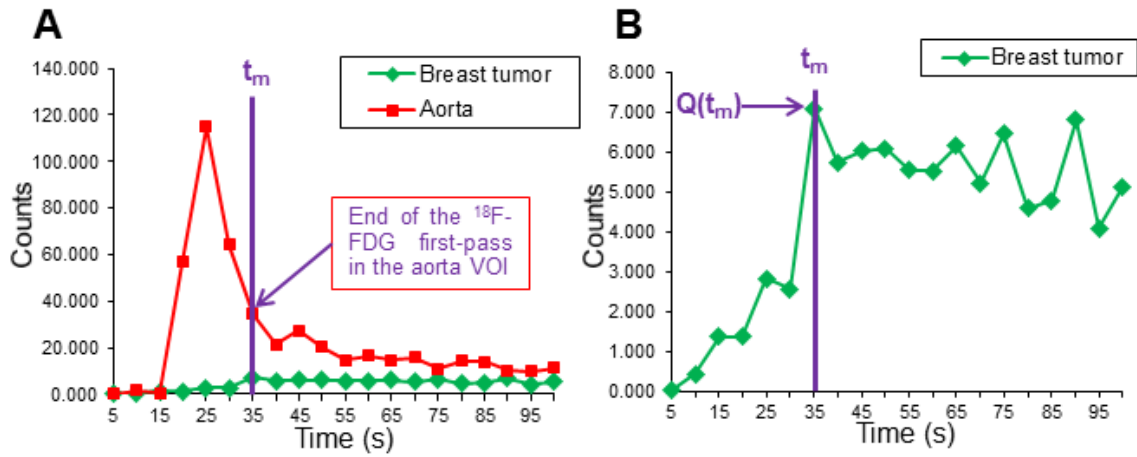

**SUPPLEMENTAL FIGURE 1.** Tumor blood flow measurement using the first 5-sec  $^{18}\text{F}$ -FDG PET images (early dynamic acquisition) with the volumes of interest (VOI) drawn on the ascending aorta and tumor. **(A)** The red line represents the arterial time-activity curve and the green line the tumor time-activity curve. The peak count time ( $T_m$ ) is visually defined as the end of the first pass of the tracer through the arterial VOI. **(B)** The green line represents the tumor time-activity curve.  $T_m$  is the peak count time as previously defined on the arterial time-activity curve.
